# Supplementary material
Source: PubMed Central journal article supplement (PMC8106768)

**Appendix I.**

**Supplementary Table 1. Medication regimen complexity–intensive care unit Scoring Tool**

| <b>MRC-ICU Scoring Tool</b>                                              |                    |
|--------------------------------------------------------------------------|--------------------|
| <b>Parameter</b>                                                         | <b>Point Value</b> |
| <b>High Priority Medications</b>                                         |                    |
| Aminoglycosides (amikacin, gentamicin, tobramycin)                       | 3x                 |
| Amphotericin B and Liposomal Amphotericin B                              | 1                  |
| Antiarrhythmics (amiodarone, dofetilide, sotalol)                        | 1x                 |
| Anticoagulants (NOAC's/DOAC's, fondaparinux)                             | 1x                 |
| Anticonvulsants (carbamazepine, phenobarbital, phenytoin, valproic acid) | 3x                 |
| Argatroban                                                               | 2                  |
| Azole antifungals (posaconazole, voriconazole)                           | 2x                 |
| Blood Products (Factor products, Antithrombin III)                       | 2x                 |
| Chemotherapy (active inpatient)                                          | 3x                 |
| Clozapine                                                                | 3                  |
| Digoxin                                                                  | 3                  |
| Ganciclovir/valganciclovir                                               | 1x                 |
| Hyperosmolar fluids (hypertonic saline (1.5%, 3%, 23.4%), mannitol)      | 1x                 |
| Immunosuppressants (cyclosporine, sirolimus, tacrolimus)                 | 3x                 |
| Lidocaine (continuous infusion)                                          | 2                  |
| Lithium                                                                  | 3                  |

|                                                                                                            |    |
|------------------------------------------------------------------------------------------------------------|----|
| Prostacyclins (epoprostenol, iloprost, treprostinil)                                                       | 2x |
| Theophylline                                                                                               | 3  |
| Therapeutic heparins (enoxaparin, heparin infusion)                                                        | 2x |
| Vancomycin (IV)                                                                                            | 3  |
| Warfarin                                                                                                   | 3  |
| <b>ICU Medications</b>                                                                                     |    |
| Neuromuscular Blockade                                                                                     | 2  |
| Continuous infusions (exclude those listed elsewhere)                                                      | 1x |
| <b>Total Parenteral Nutrition</b>                                                                          |    |
| Managed by non-pharmacist service                                                                          | 1  |
| Managed by clinical specialist pharmacist                                                                  | 3  |
| <b>ICU Prophylaxis and FAST HUGS BID</b>                                                                   |    |
| Thromboembolic prophylaxis (exclude heparin infusion, therapeutic enoxaparin)                              | 1  |
| Stress ulcer prophylaxis (exclude pantoprazole infusion)                                                   | 1  |
| Glycemic control (subcutaneous insulin; exclude IV insulin)                                                | 1  |
| Bowel regimen                                                                                              | 1  |
| Chlorhexidine                                                                                              | 1  |
| <b>Analgesia and Sedation</b>                                                                              |    |
| Opioids and sedatives (scheduled and PRN)                                                                  | 1x |
| Continuous infusion opioids and sedatives (propofol, fentanyl, dexmedetomidine, ketamine, benzodiazepines) | 2x |
| <b>Antimicrobial Agents</b>                                                                                |    |
| Antimicrobials (include HIV medications, exclude those listed elsewhere)                                   | 1x |

|                                                                                                                                                 |    |
|-------------------------------------------------------------------------------------------------------------------------------------------------|----|
| Restricted antimicrobials (4 <sup>th</sup> -5 <sup>th</sup> generation cephalosporins, carbapenems, linezolid, daptomycin, colistin/polymyxins) | 2x |
| <b>Devices</b>                                                                                                                                  |    |
| Dialysis                                                                                                                                        | 2  |
| Extracorporeal membrane oxygenation (ECMO)                                                                                                      | 2  |
| Intra-aortic balloon pump (IABP)                                                                                                                | 1  |
| Left ventricular assist device (LVAD)                                                                                                           | 1  |
| Mechanical ventilation                                                                                                                          | 2  |

Each individual medication or medication class listed has a weighted score (i.e., 1, 2, or 3 points). This multiplier indicates that for every medication that meets those criteria, the score is multiplied (e.g., if fentanyl and midazolam are prescribed, this total would be 2 points multiplied by each medication for a total of 4 points). The MRC-ICU is then the sum of all the points assigned to the medications.

**Supplementary Table 2. Performance of the machine learning algorithms on Sub-model: base model only with medication regimen complexity and MRC-ICU values at 24h**

|            | <b>AUC (95% CI)</b>    | <b>Se (95% CI)</b>     | <b>Sp (95% CI)</b>     | <b>PPV (95% CI)</b>    | <b>NPV (95% CI)</b>    |
|------------|------------------------|------------------------|------------------------|------------------------|------------------------|
| <b>KNN</b> | 0.81(0.64,0.93)        | 0.81(0.64,0.93)        | 0.20(0.10,1.00)        | 0.91 (0.87,1.00)       | 0.23(0.12,0.46)        |
| <b>NB</b>  | 0.78(0.60,0.91)        | 0.81(0.63,0.93)        | 0.32(0.11,0.98)        | 0.96(0.80,1.00)        | 0.00(0.00,0.46)        |
| <b>RF</b>  | 0.75(0.57,0.89)        | 0.82(0.63,0.94)        | 0.25(0.01,0.81)        | 0.88(0.70,0.98)        | 0.17(0.00,0.64)        |
| <b>SVM</b> | 0.78(0.60,0.91)        | 0.85(0.66,0.96)        | 0.85(0.05,0.85)        | 0.88(0.70,0.98)        | 0.33(0.04,0.78)        |
| <b>NN</b>  | 0.66(0.47,0.81)        | 0.83(0.61,0.95)        | 0.22(0.03,0.60)        | 0.73(0.52,0.88)        | 0.33(0.04,0.78)        |
| <b>LC</b>  | <b>0.75(0.57,0.89)</b> | <b>0.85(0.65,0.96)</b> | <b>0.33(0.04,0.78)</b> | <b>0.85(0.65,0.96)</b> | <b>0.33(0.04,0.78)</b> |

Abbreviations: KNN: K-nearest neighbor, NB: naive Bayes, RF: random forest, SVM: support vector machine, NN: neural network, LC: logistic classifier, AUC: Area under the receiver operator characteristics curve, Se: Sensitivity, Sp: Specificity, PPV: positive predictive value, NPV: negative predictive value.

**Supplementary Figure 1: Variable importance plot for Model I**

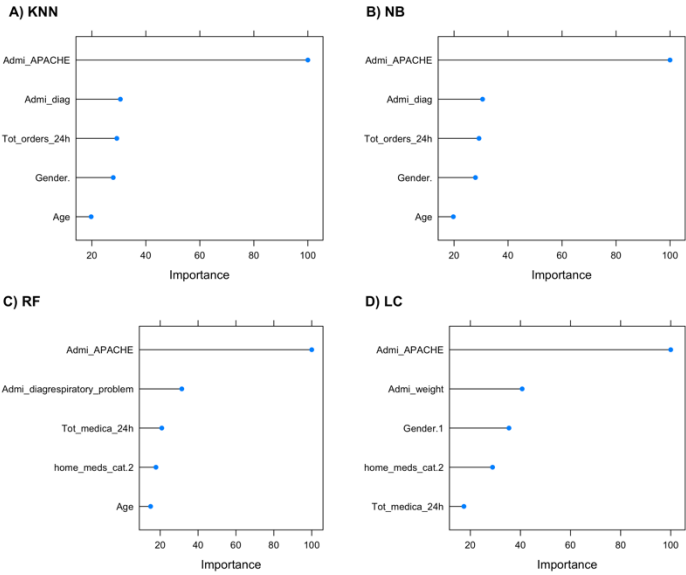

**Supplementary Figure 2: Variable importance plot for Model II**

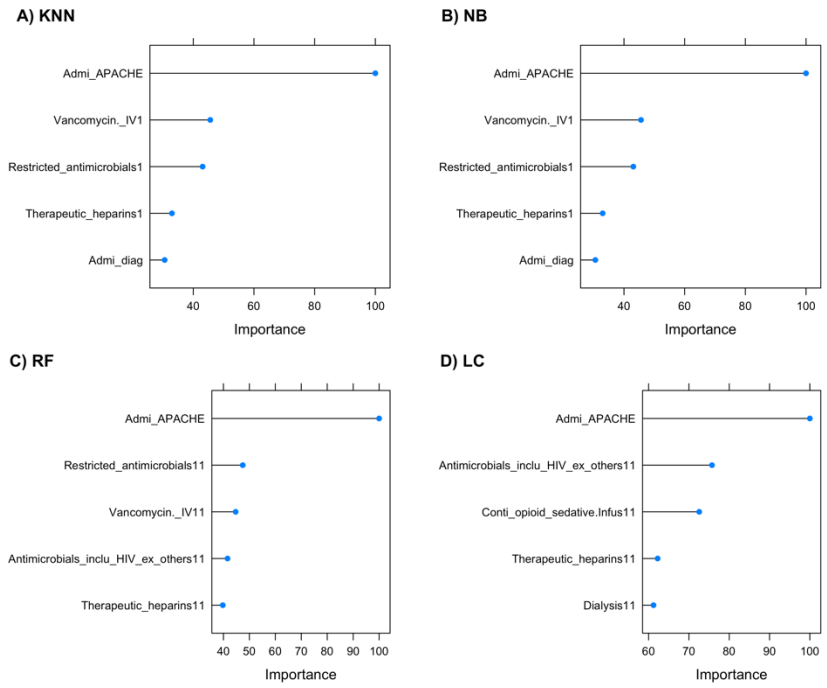

**Supplementary Figure 3: Variable importance plot for Model III**

**A) KNN**

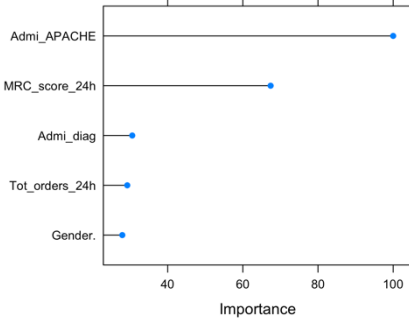

**B) NB**

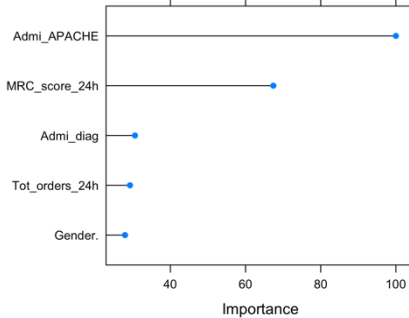

**C) RF**

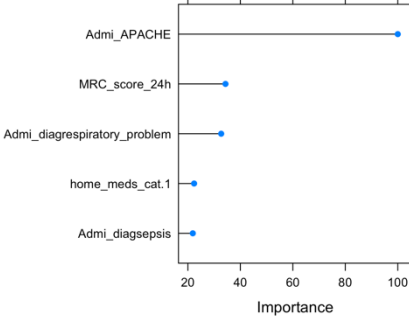

**D) LC**

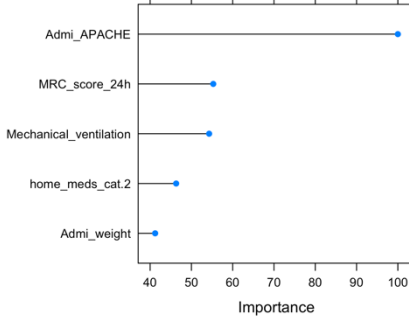

**Supplementary Figure 4: Performance matrix of the machine learning algorithms for predicting mortality among critically ill patients using three different model setups. Sub-model I: Model I with only medication regimen complexity and MRC-ICU values at 24h.**

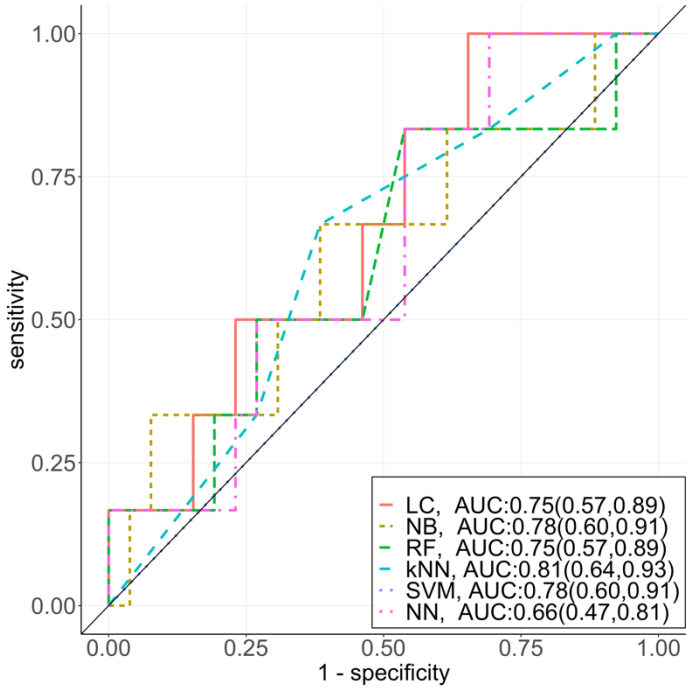



**Supplementary Figure 5: Variable importance plot for Sub-model I**

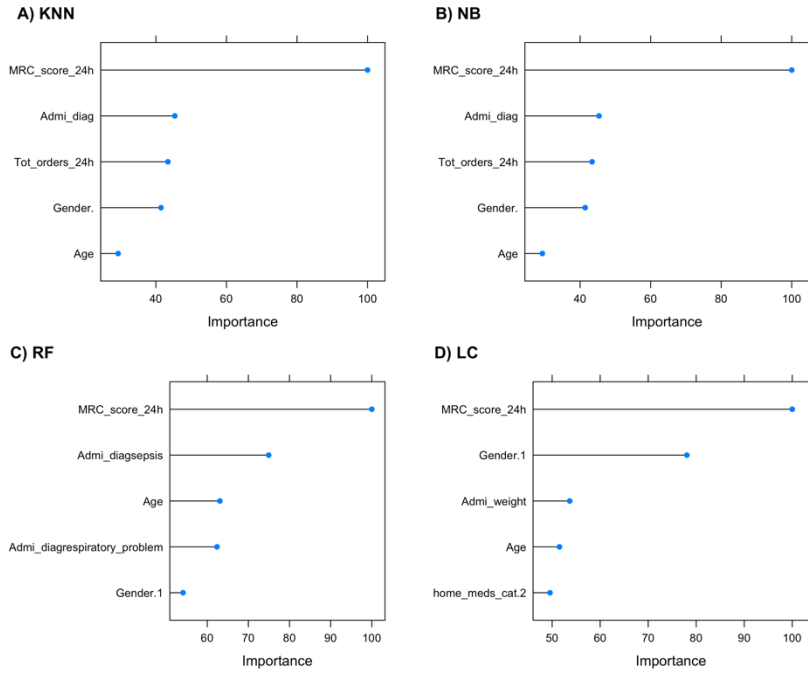

Supplement: NIHMS1698169-supplement-Supplemental_Material.pdf [file NIHMS1698169-supplement-Supplemental_Material.pdf]
